# Supplementary material for: Concurrent once-daily versus twice-daily chemoradiotherapy in patients with limited-stage small-cell lung cancer (CONVERT): an open-label, phase 3, randomised, superiority trial
Source: PubMed Central journal article supplement (PMC5555437; doi:10.1016/s1470-2045(17)30318-2), 2017-08
Supplement: mmc1.pdf [file mmc1.pdf]

# THE LANCET Oncology

## Supplementary appendix

This appendix formed part of the original submission and has been peer reviewed. We post it as supplied by the authors.

Supplement to: Faivre-Finn C, Snee M, Ashcroft L, et al, for the CONVERT Study Team. Concurrent once-daily versus twice-daily chemoradiotherapy in patients with limited-stage small-cell lung cancer (CONVERT): an open-label, phase 3, randomised, superiority trial. *Lancet Public Health* 2017; published online June 19. [http://dx.doi.org/10.1016/S1470-2045\(17\)30318-2](http://dx.doi.org/10.1016/S1470-2045(17)30318-2).

## Web appendix

### Details of Recruiting Centres, Numbers of Patients Recruited (N) and Principal Investigators.

#### UK – 33 Sites

- The Christie NHS Foundation Trust, Manchester (109) – Faivre-Finn
- Edinburgh Cancer Centre (6) – Price
- Bristol Haematology & Oncology Centre (10) – Wilson
- Dorset Cancer Centre, Poole (5) – Laurence
- Torbay Hospital, Devon (2) – Dorey
- Weston Park Hospital, Sheffield (14) – Woll/Hatton
- Lancashire Teaching Hospitals NHS Foundation Trust (15) – Appel
- Cheltenham General Hospital (3) - Guglani
- St James Hospital, Leeds (18) – Snee
- Hammersmith Hospital, London (1) – Mangar
- University College London Hospitals (3) – Carnell
- Beatson West of Scotland Cancer Centre, Glasgow (19) – Mohammed
- Glan Clwyd Hospital, North Wales (10) - Garcia
- Southampton General Hospital (14) – Bhatnagar
- Castle Hill Hospital, Hull (3) – Lind
- James Cook Hospital, Middlesbrough (3) – Peedell
- Northern Ireland Cancer Centre, Belfast City Hospital (10) – McAleese
- Royal Marsden Hospital, Surrey (18) – O’Brien/Locke
- Norfolk & Norwich University Hospital (1) – Roques
- Addenbrooke’s Hospital, Cambridge (15) – Harden
- St Bartholomew’s Hospital, London (3) - Wells
- Raigmore Hospital, Inverness (1) – Macgregor
- Bradford Royal Infirmary (4) – Snee
- Queen Elizabeth Hospital, Birmingham (2) – Chetiyawardana
- Peterborough City Hospital (2) – Fife
- Northern Centre for Cancer Care, Newcastle-upon-Tyne (20) – McMenemin
- Harrogate District NHS Foundation Trust (1) – Chan
- Derriford Hospital, Plymouth (1) – Roy
- The Clatterbridge Cancer Centre, Wirral (3) – Pope
- Charing Cross Hospital & St Mary’s Hospital, London (2) – Lewanski/Power
- Wrexham Maelor Hospital (3) – Garcia
- Ysbyty Gwynedd, Bangor (1) – Ghosal

#### EORTC - 7 Sites

- Ghent University Hospital, Gent, Belgium (15) – Surmont
- Cliniques Universitaires St Luc, Brussels, Belgium (6) – Geets
- Clinique Sainte Elisabeth, Namur, Belgium (5) – Remouchamps
- The Netherlands Cancer Institute, Amsterdam, The Netherlands (4) – Kneijens
- Arnhem S Radiotherapeutisch Instituut, Arnhem, The Netherlands (5) – Tissing-Tan
- Medical University, Gdansk, Poland (6) – Jassem
- Institute of Oncology, Ljubljana, Slovenia (13) - Zwitter

#### SPAIN – 6 Sites

- Institut Català d’Oncologia, Hospital Duran i Reynals, L’Hospitalet (12) – Cardenal
- Institut Català d’Oncologia, Hospital Universitari Germans Trias i Pujol, Badalona (2) – Jove/Carcereny
- University Hospital Ramon y Cajal, Madrid (1) – Hernanz
- Hospital de la Santa Creu i Sant Pau, Barcelona (6) – Majem/Farre
- Institut Oncològic del Vallès (IOV), Barcelona (3) – Solé Monné

- Corporació Sanitària Parc Taulí de Sabadell, Barcelona (3) – Solé Monné/García García

#### **FRANCE – 19 Sites**

- Institut de Cancérologie Lucien Neuwirth (2) – Fournel
- Centre Léon Bérard (CLB) (5) – Martel-Lafay
- Hôpital de la Croix-Rousse, Lyon (3) – Arpin
- CHU de Limoges (2) – Vergnenègre/Clavère
- CH de Villefranche/Saône (2) – Falchero
- Centre François Baclesse, Caen (4) – Gervais/Le Rouge
- CH de Aix en Provence (1) – Le Treut
- Institut Ste Catherine, Avignon (12) – Pourel
- CHI de Creteil (6) – Monnet/Martin
- CHU de Clermont-Ferrand (5) – Janicot
- HIA Toulon (1) – Bérard
- Gustave Roussy Cancer Campus, Villejuif (18) – Le Pechoux
- Centre Georges François Leclerc Dijon (5) – Peignaux/Coudert
- Assistance Publique Hôpitaux de Marseille (21) – Padovani/Barlesi
- CHU de Rennes (3) – Lena
- CHU de Caen (2) – Zalcman
- CHU de Lille (6) – Lafitte
- Centre Oscar Lambret, Lille (3) – Prevost
- CH de Libourne (2) – Abdiche

#### **CANADA - 9 Sites**

- CHUQ-Pavillon Hotel-Dieu de Quebec, Quebec City (4) – Dagnault
- Cancer Center of SE Ontario at Kingston (5) – de Metz
- Ottawa Hospital Research Institute (13) – Pantarotto
- Princess Margaret Cancer Center, Toronto (7) – Bezjak
- Allan Blair Cancer Center, Regina (2) – Koul
- Saskatoon Cancer Center (1) - Kundapur
- Cancer Care Manitoba (4) – Leylek
- Juravinski Cancer Center (4) – Okawara
- London Regional Cancer Program (1) – Yaremko

**Web appendix - Acute adverse events (up to 3 months after completion of study treatment)**

| AE<br>CTCAE v3.0    | Group | 0<br>N (%) | 1-2<br>N (%) | 3-5<br>N (%)           | P**<br>Grade 3-5 |
|---------------------|-------|------------|--------------|------------------------|------------------|
| Nausea              | BD    | 70 (26.4)  | 172 (64.9)   | 23 (8.7)               | 0.63             |
|                     | OD    | 66 (25.1)  | 171 (65.1)   | 26 (9.9)               |                  |
| Vomiting            | BD    | 146 (55.3) | 105 (39.7)   | 13 (4.9)               | 0.99             |
|                     | OD    | 155 (59.0) | 95 (36.1)    | 13 (4.9)               |                  |
| Mucositis           | BD    | 173 (65.5) | 88 (33.4)    | 3 (1.1)                | 0.34             |
|                     | OD    | 169 (64.5) | 87 (33.2)    | 6 (2.3)                |                  |
| Fatigue             | BD    | 21 (8.0)   | 212 (80.3)   | 31 (11.7)              | 0.77             |
|                     | OD    | 13 (5.0)   | 216 (82.4)   | 33 (12.6)              |                  |
| Neuropathy-motor    | BD    | 250 (94.3) | 12 (4.5)     | 1 (0.4)                | 0.62             |
|                     | OD    | 245 (93.5) | 15 (5.8)     | 2 (0.8)                |                  |
| Neuropathy-sensory  | BD    | 196 (74.5) | 63 (24.0)    | 4 (1.5)                | >0.99            |
|                     | OD    | 197 (74.9) | 61 (23.2)    | 5 (1.9)                |                  |
| Infection           | BD    | 187 (70.8) | 43 (16.3)    | 34 (12.9)              | 0.52             |
|                     | OD    | 181 (69.1) | 52 (19.9)    | 29 (11.0)              |                  |
| Anorexia            | BD    | 111 (42.0) | 135 (51.2)   | 18 (6.8)               | 0.60             |
|                     | OD    | 112 (42.8) | 129 (49.2)   | 21 (8.0)               |                  |
| Other <sup>+</sup>  | BD    | 37 (14.7)  | 150 (57.4)   | 76 (28.9)*             | 0.02             |
|                     | OD    | 33 (12.6)  | 177 (67.6)   | 52 (19.9)              |                  |
| Haemoglobin         | BD    | 39 (14.7)  | 194 (72.9)   | 33 (12.4)              | 0.72             |
|                     | OD    | 41 (15.7)  | 184 (70.8)   | 35 (13.5)              |                  |
| Neutrophils         | BD    | 31 (11.7)  | 38 (13.7)    | 197 (74.1)             | 0.03             |
|                     | OD    | 43 (16.5)  | 47 (18.1)    | 170 (65.4)             |                  |
| Febrile neutropenia | BD    | 203 (76.6) | NA           | 62 (23.4)              | 0.13             |
|                     | OD    | 214 (82.0) |              | 47 (18.0) <sup>#</sup> |                  |
| Platelets           | BD    | 132 (49.6) | 89 (33.5)    | 45 (16.9)              | 0.26             |
|                     | OD    | 119 (45.8) | 87 (33.4)    | 54 (20.8)              |                  |
| Oesophagitis        | BD    | 48 (18.9)  | 159 (62.6)   | 47 (18.5)              | 0.85             |
|                     | OD    | 63 (25.7)  | 135 (55.1)   | 47 (19.2)              |                  |
| Pneumonitis         | BD    | 198 (78.0) | 51 (20.1)    | 5 (2.0)~               | 0.70             |
|                     | OD    | 187 (77.3) | 49 (20.2)    | 6 (2.4)~               |                  |

BD – twice-daily

OD – once-daily

<sup>+</sup> ‘Other’ grade 3 reported toxicities included:

For OD arm, diarrhoea, hyponatremia, urinary retention and dysphagia and lymphopenia

For BD arm, diarrhoea, constipation, hyponatremia, dysphagia, lymphopenia, dyspnoea and leukopenia

\* 2 grade 5 (peripheral arterial ischaemia and 1 septic shock)

<sup>#</sup> 1 grade 5

~ 3 grade 5 (2 in the once-daily arm & 1 in the twice-daily arm)

\*\*p values are calculated using chi-square tests

### Web appendix – Post-Progression Treatment Data

|                     | <b>Twice-daily radiotherapy</b><br>N=153* | <b>Once-daily radiotherapy</b><br>N=139* |
|---------------------|-------------------------------------------|------------------------------------------|
| <b>Chemotherapy</b> | 88 (58%)                                  | 82 (59%)                                 |
| <b>Radiotherapy</b> | 42 (27%)                                  | 33 (24%)                                 |
| <b>Surgery</b>      | 8 (5%)                                    | 8 (6%)                                   |
| <b>Other</b>        | 19 (12%)                                  | 12 (9%)                                  |

\*Figures provided from the group of patients who progressed after initial chemo-radiotherapy. The denominators are the number of progressors and the figures are marginal i.e. there may be overlap e.g. chemotherapy + radiotherapy etc.
